# Supplementary material for: Phosphoproteome dynamics reveal novel ERK1/2 MAP kinase substrates with broad spectrum of functions
Source: PubMed Central journal article supplement — Mol Syst Biol. 2013 May 28;9:669. doi: 10.1038/msb.2013.25 (PMC4188273; doi:10.1038/msb.2013.25), 2013-05-28
Supplement: msb201325-s1.pdf [file msb201325-s1.pdf]

## SUPPLEMENTARY INFORMATION

### SI TABLES

#### **Table S1. List of annotated phosphorylation sites**

The list of 7936 identified phosphorylation sites was annotated using ProteoConnections. The following data fields are reported: accession number, gene symbol, description, species, residue, position, site localization confidence, peptide sequence, peptide modifications, Mascot peptide score, known phosphorylation site, kinase motifs and predictions, phosphorylation binding motif, NLS, NES, protein domains, disordered regions prediction, secondary structure prediction, solvent accessibility prediction, PDB structure, glycosylation predictions, and site conservation in other species.

#### **Table S2. Kinetic profiles of phosphorylated peptides**

Kinetic profiles of identified phosphorylated peptides for cytosolic (3,015 profiles) and nuclear (5,222 profiles) fractions are reported with the following values: peptide m/z, retention time, charge, sequence, modifications, Mascot peptide score, protein accession, gene symbol, name, peptide start and stop position, modification positions on protein, ProteoConnections protein and kinetic graph links, average peptide abundance for each time point, number of replicates where the peptide is found, fold-change(treated/control) and p-value (two-tailed Student t-test).

### **Table S3. Kinetic profiles of candidate ERK1/2 substrates**

Kinetic profiles of candidate ERK1/2 substrates are reported for cytosolic (73 profiles) and nuclear (171 profiles) fractions. Values are the same as in Table S2. In addition, annotations for each phosphorylation site are included in the file (as in Table S1) with two additional columns to show the presence of potential DEF and D domain motif in the protein. Substrates validated by *in vitro* kinase assays are highlighted in green.

### **Table S4. Gene Ontology analysis of candidate ERK1/2 substrates**

Gene Ontology enrichment analyses were performed using the tools included in ProteoConnections. The following fields are reported: GO term identifier, ontology, ontology name, definition, depth, p-value (Fisher's exact test), number in candidate ERK1/2 substrates list, number in the rat proteome, ratio, enrichment, and IPI protein identifiers.

### **Table S5. ERK1/2 substrates validated by *in vitro* kinase assays**

List of six ERK1/2 substrates validated by *in vitro* kinase assays. The following data fields are reported: gene symbol, description, molecular function, residue position, cellular fraction,  $\Sigma \log_{10}(\text{Stimulated } t_i / \text{Control } t_{0 \text{ min}})$  and  $\Sigma \log_{10}(\text{PD184352 } t_i / \text{DMSO } t_i)$  ( $t_i$  : 0, 5, 15, 60 min time points).

## SI REFERENCES

Allen JJ, Li M, Brinkworth CS, Paulson JL, Wang D, Hubner A, Chou WH, Davis RJ, Burlingame AL, Messing RO, Katayama CD, Hedrick SM, Shokat KM (2007) A semisynthetic epitope for kinase substrates. *Nat Methods* **4**: 511-516

Campbell DH, Sutherland RL, Daly RJ (1999) Signaling pathways and structural domains required for phosphorylation of EMS1/cortactin. *Cancer Res* **59**: 5376-5385

Carlson SM, Chouinard CR, Labadorf A, Lam CJ, Schmelzle K, Fraenkel E, White FM (2011) Large-Scale Discovery of ERK2 Substrates Identifies ERK-Mediated Transcriptional Regulation by ETV3. *Sci Signal* **4**: rs11

Eblen ST, Kumar NV, Shah K, Henderson MJ, Watts CK, Shokat KM, Weber MJ (2003) Identification of novel ERK2 substrates through use of an engineered kinase and ATP analogs. *J Biol Chem* **278**: 14926-14935

Han MY, Kosako H, Watanabe T, Hattori S (2007) Extracellular signal-regulated kinase/mitogen-activated protein kinase regulates actin organization and cell motility by phosphorylating the actin cross-linking protein EPLIN. *Mol Cell Biol* **27**: 8190-8204

Ishibe S, Joly D, Liu ZX, Cantley LG (2004) Paxillin serves as an ERK-regulated scaffold for coordinating FAK and Rac activation in epithelial morphogenesis. *Mol Cell* **16**: 257-267

Kosako H, Yamaguchi N, Aranami C, Ushiyama M, Kose S, Imamoto N, Taniguchi H, Nishida E, Hattori S (2009) Phosphoproteomics reveals new ERK MAP kinase targets and links ERK to nucleoporin-mediated nuclear transport. *Nat Struct Mol Biol* **16**: 1026-1035

Ku H, Meier KE (2000) Phosphorylation of paxillin via the ERK mitogen-activated protein kinase cascade in EL4 thymoma cells. *J Biol Chem* **275**: 11333-11340

Marklund U, Brattsand G, Shingler V, Gullberg M (1993) Serine 25 of oncoprotein 18 is a major cytosolic target for the mitogen-activated protein kinase. *J Biol Chem* **268**: 15039-15047

Martinez-Quiles N, Ho HY, Kirschner MW, Ramesh N, Geha RS (2004) Erk/Src phosphorylation of cortactin acts as a switch on-switch off mechanism that controls its ability to activate N-WASP. *Mol Cell Biol* **24**: 5269-5280

Old WM, Shabb JB, Houel S, Wang H, Coutts KL, Yen CY, Litman ES, Croy CH, Meyer-Arendt K, Miranda JG, Brown RA, Witze ES, Schweppe RE, Resing KA, Ahn NG (2009) Functional proteomics identifies targets of phosphorylation by B-Raf signaling in melanoma. *Mol Cell* **34**: 115-131

Pan C, Olsen JV, Daub H, Mann M (2009) Global effects of kinase inhibitors on signaling networks revealed by quantitative phosphoproteomics. *Mol Cell Proteomics* **8**: 2796-2808

Schonwasser DC, Palmer RH, Herget T, Parker PJ (1996) p42 MAPK phosphorylates 80 kDa MARCKS at Ser-113. *FEBS Lett* **395**: 1-5

Sif S, Stukenberg PT, Kirschner MW, Kingston RE (1998) Mitotic inactivation of a human SWI/SNF chromatin remodeling complex. *Genes Dev* **12**: 2842-2851

Sundberg-Smith LJ, Doherty JT, Mack CP, Taylor JM (2005) Adhesion stimulates direct PAK1/ERK2 association and leads to ERK-dependent PAK1 Thr212 phosphorylation. *J Biol Chem* **280**: 2055-2064

Warn-Cramer BJ, Lampe PD, Kurata WE, Kanemitsu MY, Loo LW, Eckhart W, Lau AF (1996) Characterization of the mitogen-activated protein kinase phosphorylation sites on the connexin-43 gap junction protein. *J Biol Chem* **271**: 3779-3786

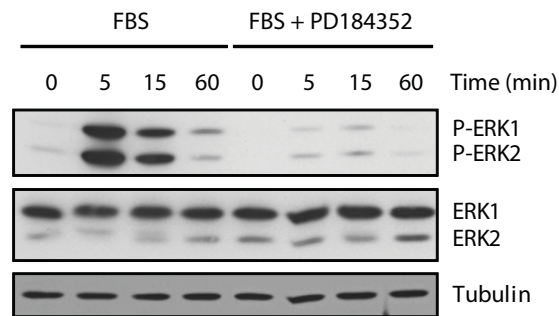

**Figure S1. PD184352 inhibits the activating phosphorylation of ERK1/2**

IEC-6 intestinal epithelial cells were starved of serum for 24 hours, treated or not with 2  $\mu$ M PD184352 for 1 h, and then stimulated with 10% fetal bovine serum for 5, 15 or 60 min. The expression and activating phosphorylation of ERK1/2 were analyzed by immunoblotting. Tubulin was used as loading control.

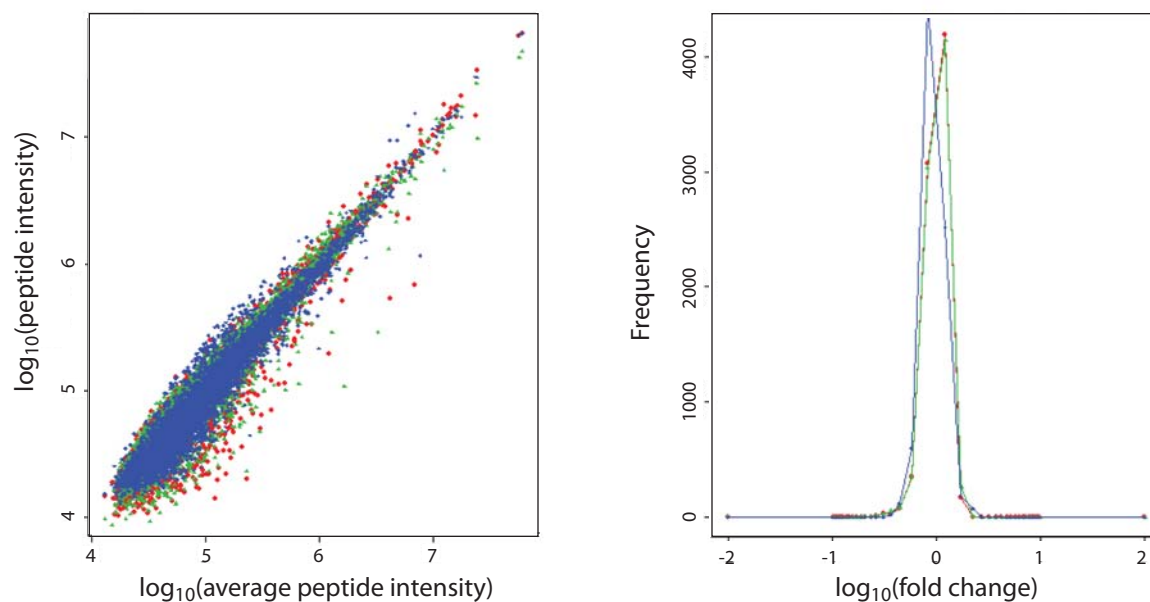

**Figure S2. Reproducibility of label-free phosphopeptide quantification**

TiO<sub>2</sub> enriched phosphopeptides were analyzed in triplicates by nanoLC-MS/MS on LTQ-Orbitrap and quantified by a label-free method. Phosphopeptides were detected from raw MS spectrum and aligned between replicates. Shown are biological replicates of the PD184352-treated cytosolic fraction stimulated for 5 min condition to demonstrate the reproducibility of the experiment. 95% of phosphopeptides show less than two-fold change and the coefficient of variation (CV) of the measured peak intensities for the replicates was on average 37%.

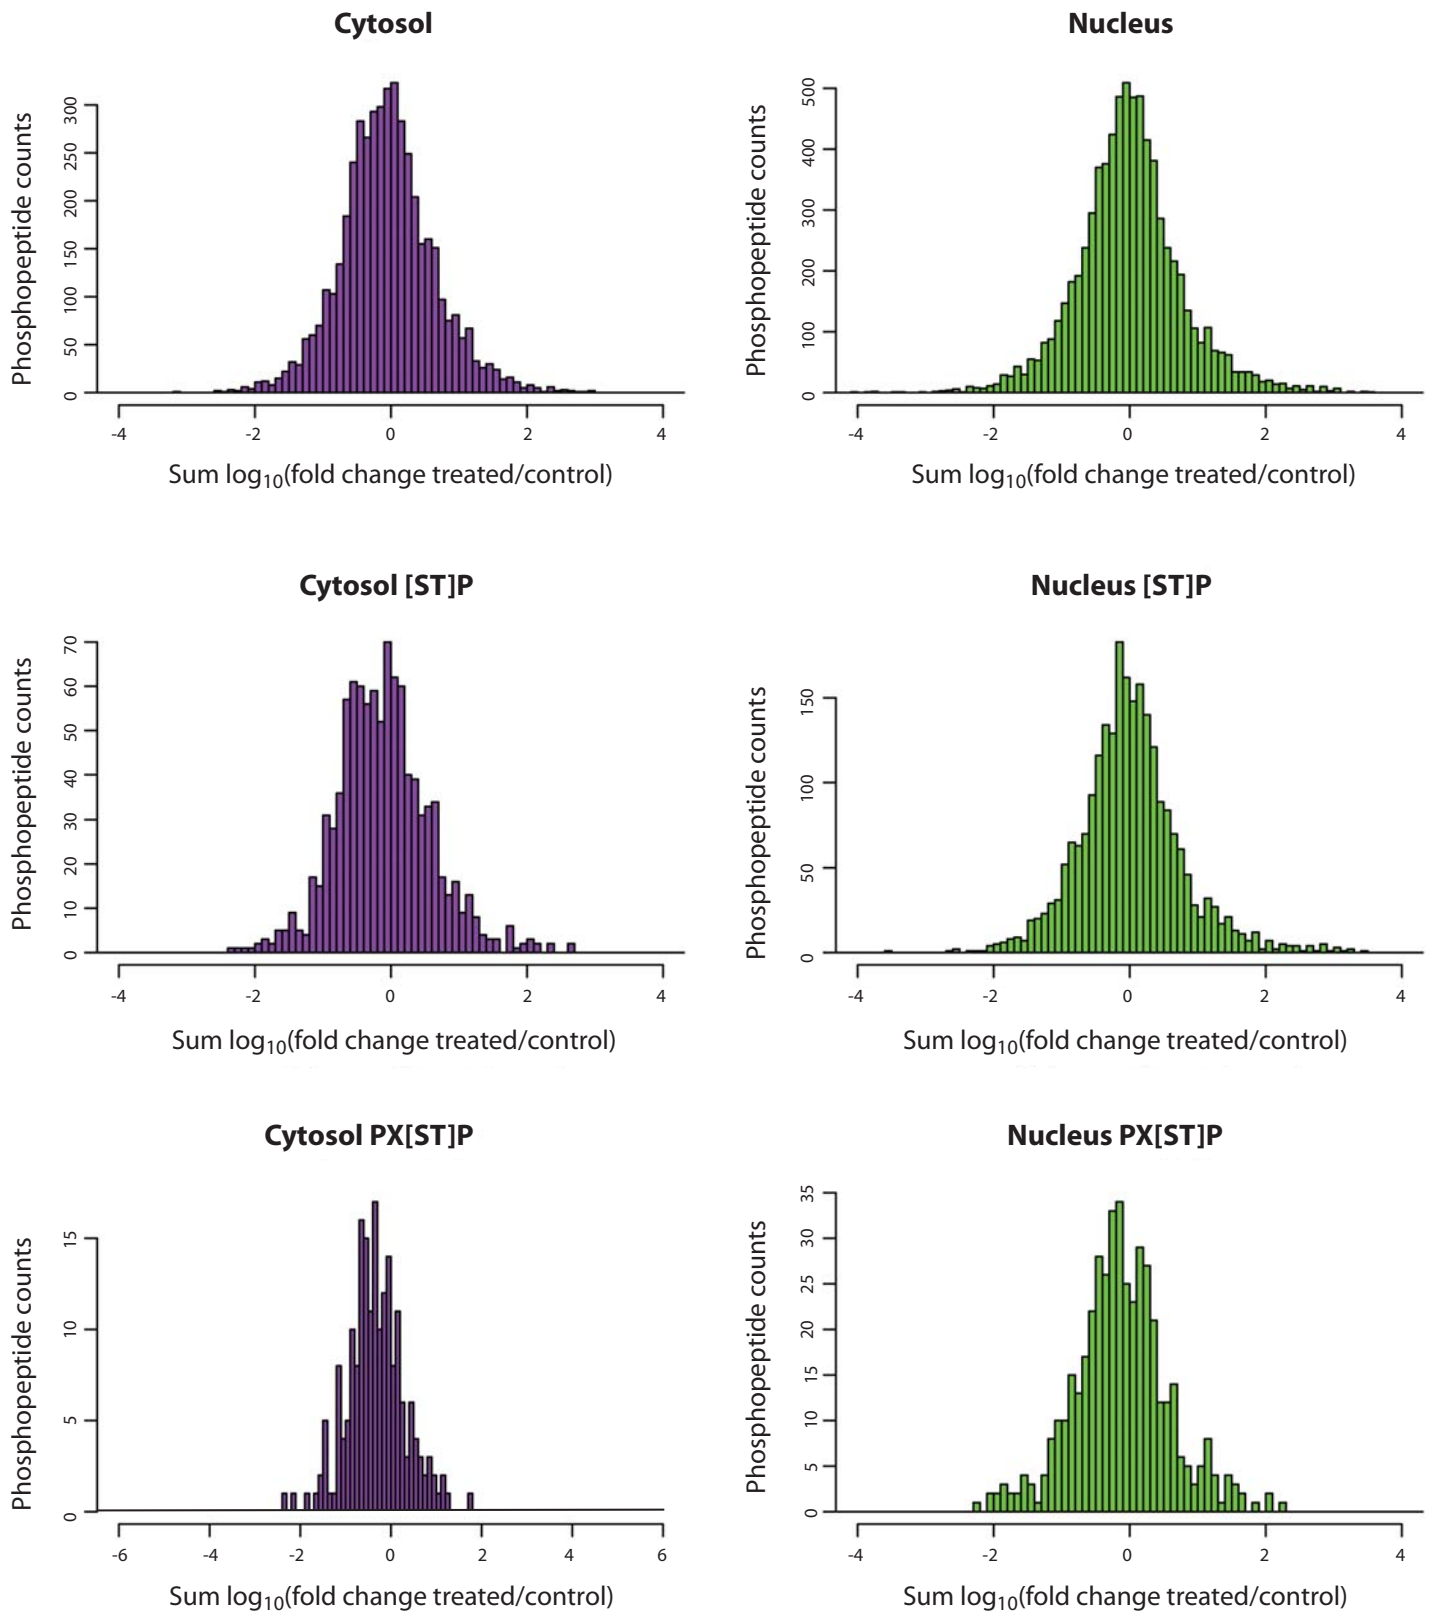

**Figure S3. Distributions of changes in phosphorylation site abundance after MEK1/2 inhibition**  
 The distributions show the measured  $\log_{10}(\text{PD184352}/\text{control})$  of phosphopeptides for the four experimental time points.

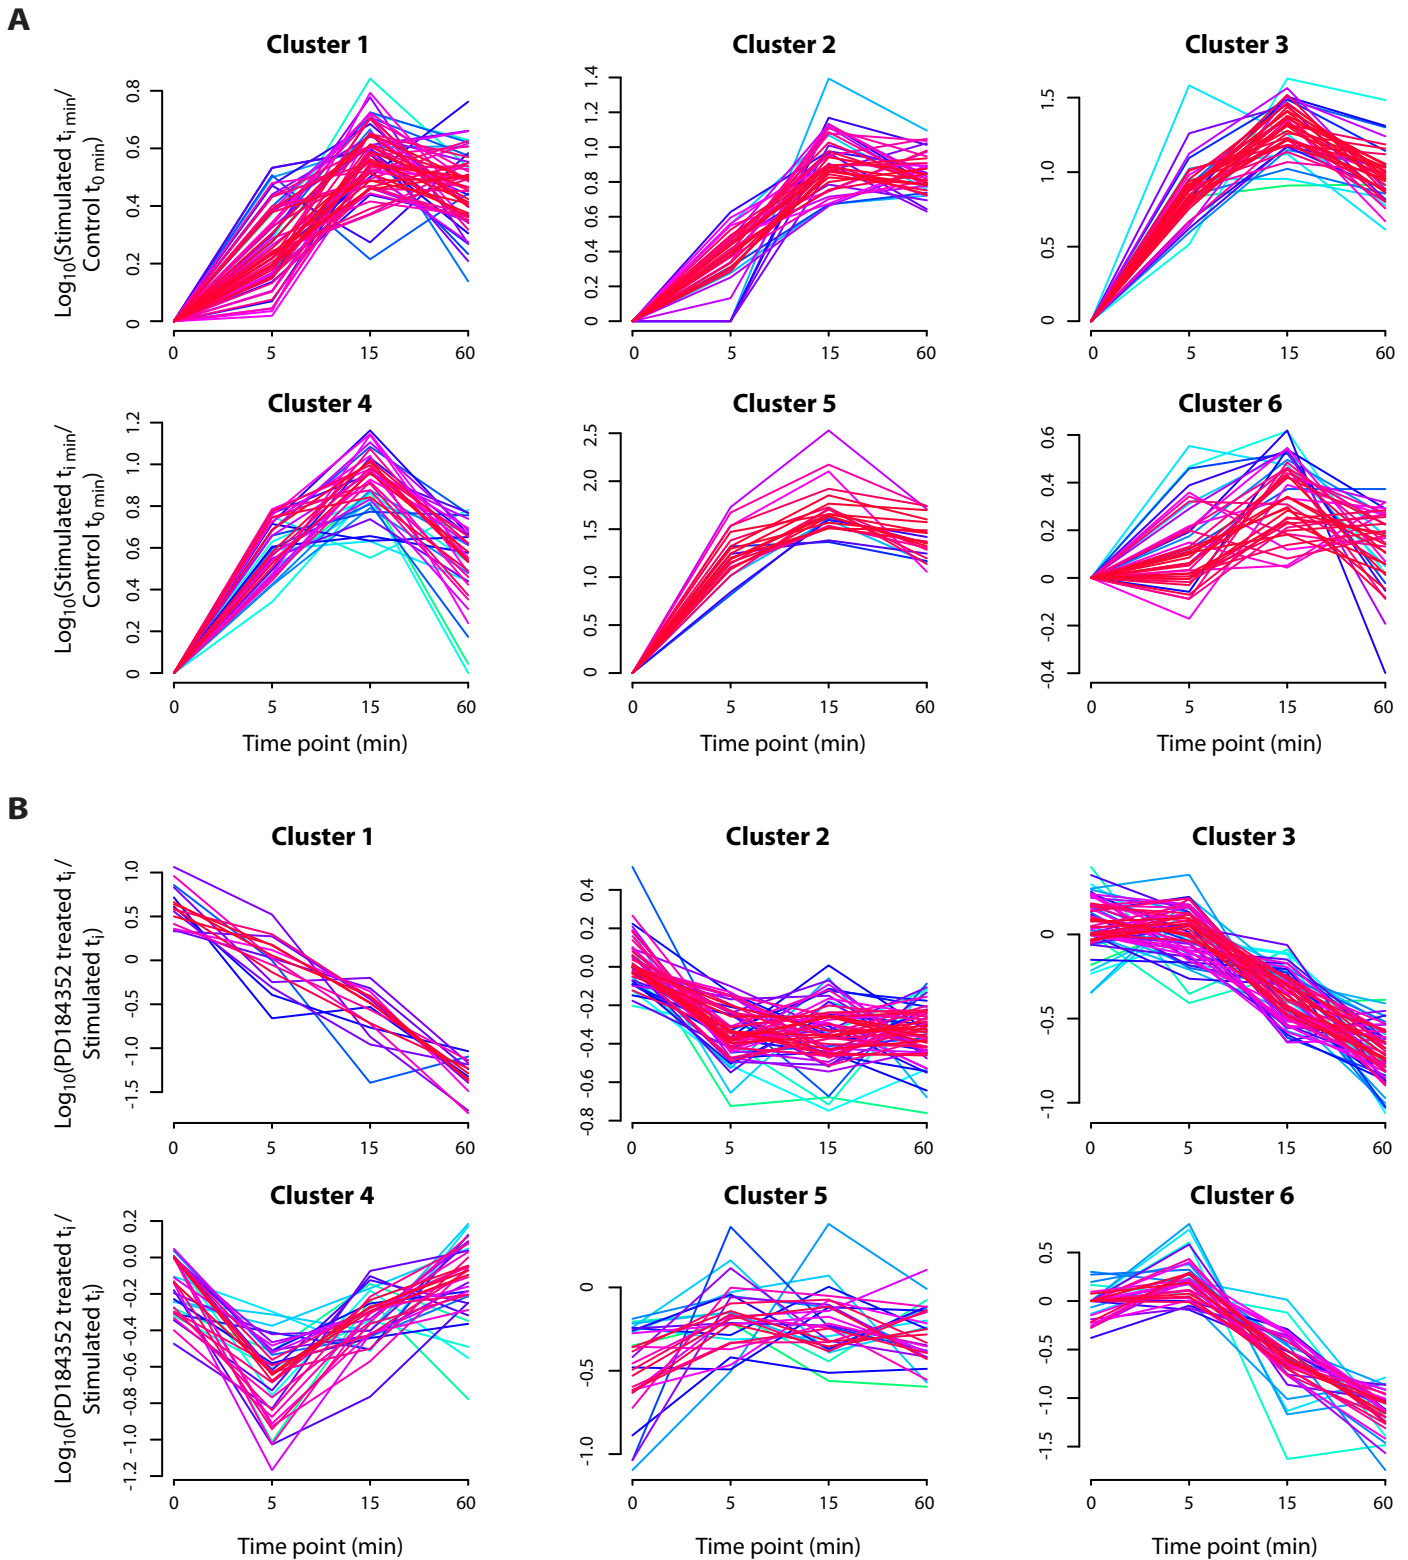

**Figure S4. Kinetic profiles of the phosphorylation of candidate ERK1/2 substrates**

Phosphorylation profiles of selected candidate ERK1/2 substrates after serum stimulation (A) and PD184352 inhibition (B). Soft-clustering of kinetic profiles (fuzzy c-means clustering MFuzz R package,  $c=6$ ,  $m=1.5$ ) was done to show 6 patterns (arbitrary chosen number) of phosphorylation change trends for both experimental groups. Fuzzy c-means clustering is a soft-clustering algorithm that distinguishes itself from hard-clustering algorithm by providing membership probability value to each member of the clusters (high and low memberships are shown with a gradient from red and green).



**A**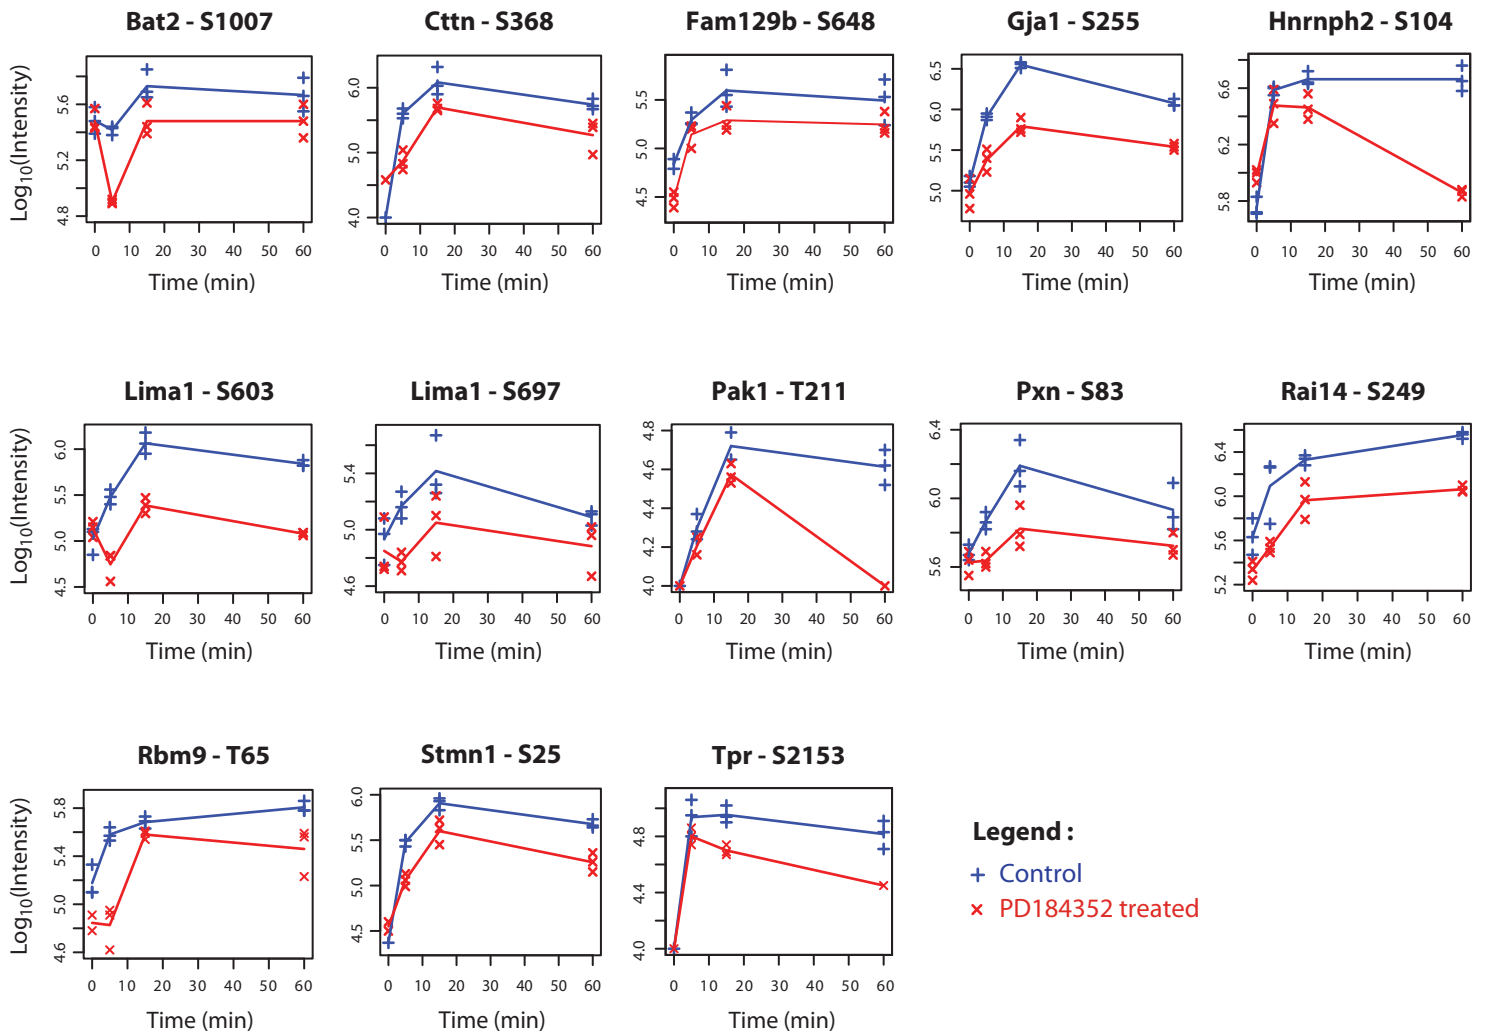**B**

| Gene symbol    | Name                                       | Position           | References                                                                                      |
|----------------|--------------------------------------------|--------------------|-------------------------------------------------------------------------------------------------|
| <b>Bat2</b>    | Large proline-rich protein BAT2            | S1007 (mouse)      | Carlson et al. Sci Sign 2011                                                                    |
| <b>Ctnn</b>    | Cortactin isoform B                        | S405 (human)       | Campbell et al. Cancer res 1999;<br>Martinez-Quiles et al. Mol Cell Biol 2004                   |
| <b>Fam129b</b> | Niban-like protein 1                       | S646 (human)       | Old et al. Mol Cell 2009;<br>Kosako et al. Nat Struct Mol Biol 2009                             |
| <b>Gja1</b>    | Gap junction alpha-1 protein               | S255 (rat)         | Warn-Cramer et al. J Biol Chem 1996                                                             |
| <b>Hnrnp2</b>  | Heterogeneous nuclear ribonucleoprotein H2 | S104 (mouse)       | Carlson et al. Sci Signal 2011                                                                  |
| <b>Lima1</b>   | Epithelial protein lost in neoplasm        | S602, S697 (mouse) | Han et al. Mol Cell Biol 2007                                                                   |
| <b>Pak1</b>    | Serine/Threonine-protein kinase PAK1       | T211 (rat)         | Sundberg-Smith et al. J Biol Chem 2005                                                          |
| <b>Pxn</b>     | Paxillin                                   | S83 (mouse)        | Ku and Meier. J Biol Chem 2000;<br>Ishibe et al. Moll Cell 2004                                 |
| <b>Rai14</b>   | Isoform 2 of Ankyrcorbin                   | T249 (mouse)       | Carlson et al. Sci Sign 2011                                                                    |
| <b>Rbm9</b>    | RNA-binding protein 9                      | T65 (mouse)        | Carlson et al. Sci Sign 2011                                                                    |
| <b>Stmn1</b>   | Stathmin                                   | S25 (human)        | Marklund et al. J Biol Chem 1993                                                                |
| <b>Tpr</b>     | Translocated promoter region               | S2153 (mouse)      | Carlson et al. Sci Sign 2011;<br>Eblen et al. J Biol Chem 2003<br>Allen et al. Nat Methods 2007 |

**Figure S5. Identification of previously known ERK1/2 substrates**

(A) Kinetic analysis of the site-specific changes in phosphorylation for the twelve known ERK1/2 substrates in response to serum stimulation and MEK1/2 inhibition. (B) The name of the twelve substrates and the sites phosphorylated by ERK1/2 are indicated with the original references.

| Gene symbol     | Name                                                                                          | Position (this study)                                             | Phosphorylation site (other studies)                                                                         | AS-ERK2 (Carlson et al.) | Biochemical validation (reference)                                                   |
|-----------------|-----------------------------------------------------------------------------------------------|-------------------------------------------------------------------|--------------------------------------------------------------------------------------------------------------|--------------------------|--------------------------------------------------------------------------------------|
| <b>Marcks</b>   | Myristoylated alanine-rich C-kinase substrate                                                 | S138                                                              | S101 (Old et al. Mol Cell 2009)                                                                              | -                        | Kinase assay (Schönwasser et al. FEBS Lett 1996)                                     |
| <b>Smarca5</b>  | SWI/SNF-related matrix-associated actin-dependent regulator of chromatin subfamily A member 5 | S65                                                               | -                                                                                                            | -                        | Kinase assay (Sif et al. Genes Dev 1998)                                             |
| <b>Dync1li1</b> | Cytoplasmic dynein 1 light intermediate chain 1                                               | T513                                                              | NI <sup>a</sup> (Kosako et al. Nat Struct Mol Biol 2009)                                                     | S516                     | Kinase assay (Kosako et al. Nat Struct Mol Biol 2009)                                |
| <b>Nup153</b>   | Nuclear pore complex protein Nup153                                                           | S1087                                                             | S334 (Pan et al. Mol Cell Proteomics 2009)                                                                   | T610                     | Kinase assay and phosphospecific antibodies (Kosako et al. Nat Struct Mol Biol 2009) |
| <b>Nup214</b>   | Nuclear pore complex protein Nup214                                                           | S932                                                              | S430, T437 (Pan et al. Mol Cell Proteomics 2009)<br>NI <sup>a</sup> (Kosako et al. Nat Struct Mol Biol 2009) | -                        | Kinase assay (Kosako et al. Nat Struct Mol Biol 2009)                                |
| <b>Ahctf1</b>   | Protein ELYS                                                                                  | S1080<br>S1305<br>S1335                                           | -                                                                                                            | T1954                    | -                                                                                    |
| <b>Ahnak</b>    | Neuroblast differentiation-associated protein AHNAK                                           | S94<br>S178<br>S1107<br>S2134<br>S2181<br>S4751<br>S4767<br>S5397 | -                                                                                                            | T510                     | -                                                                                    |
| <b>Map1b</b>    | Microtubule-associated protein 1B                                                             | S1494                                                             | -                                                                                                            | T1784                    | -                                                                                    |
| <b>Aim1</b>     | Absent in melanoma 1 protein                                                                  | S452                                                              | -                                                                                                            | T655                     | -                                                                                    |
| <b>Cdc42ep1</b> | Cdc42 effector protein 1                                                                      | S194                                                              | -                                                                                                            | S19<br>S113<br>T197      | Kinase assay (Carlson et al. Sci Signal 2011)                                        |
| <b>Cdc42ep2</b> | Cdc42 effector protein 2                                                                      | S137<br>S141                                                      | -                                                                                                            | S110                     | -                                                                                    |
| <b>Phf2</b>     | Lysine-specific demethylase PHF2                                                              | S357<br>S505                                                      | -                                                                                                            | S651                     | -                                                                                    |
| <b>Rai1</b>     | Retinoic acid-induced protein 1                                                               | S1114                                                             | -                                                                                                            | T1051                    | -                                                                                    |
| <b>Tnks1bp1</b> | 182 kDa tankyrase-1-binding protein                                                           | S757                                                              | -                                                                                                            | T131<br>T1025            | -                                                                                    |
| <b>Wiz</b>      | Widely-interspaced zinc finger-containing protein                                             | S323<br>S328                                                      | -                                                                                                            | S288                     | -                                                                                    |

<sup>a</sup> NI, site not identified

**Figure S6. Previously reported ERK1/2 substrates with unmapped or distinct phosphorylation sites**

Each protein is described with the phosphorylation site(s) identified in this study (this study), the phosphorylated residue(s) identified in other studies, the type of biochemical validation and the original references.

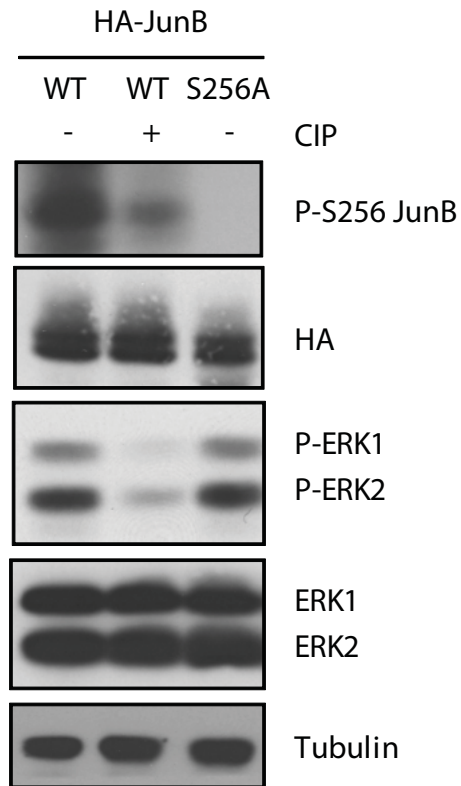

**Figure S7. Validation of the phospho-JunB(Ser256) specific antibody**

HEK 293 cells were transfected with HA-JunB wild type (WT) or S256A mutant. Cellular extracts were treated or not with calf intestinal phosphatase (CIP) (20 U for 50  $\mu$ g of extract) for 1 h at 37°C. Phosphorylation of JunB was monitored by immunoblotting with anti-JunB (Ser256) antibody (Sigma). Phosphorylation of ERK1/2 was used as a positive control of dephosphorylation.

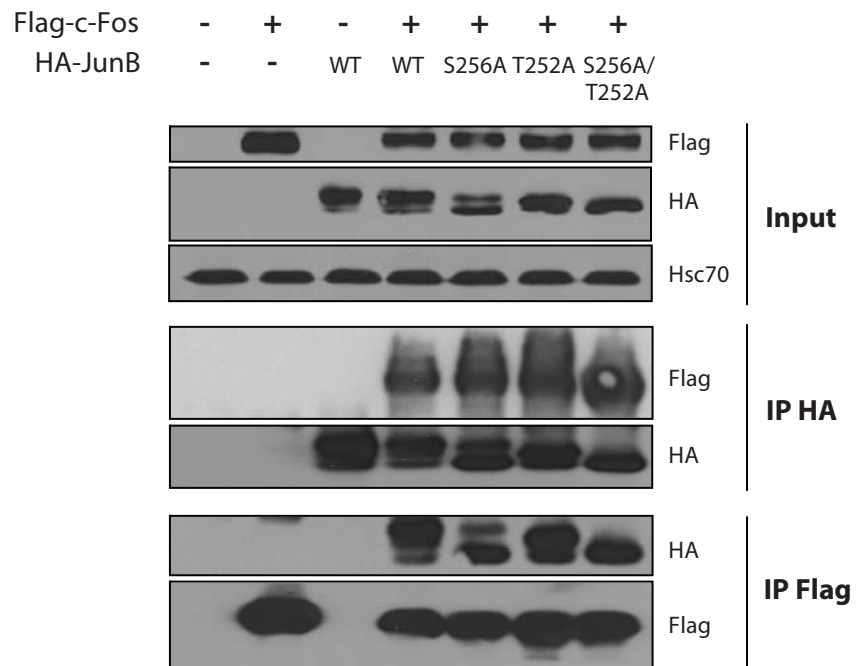

**Figure S8. Impact of Ser256 and Thr252 phosphorylation of the interaction of JunB with c-Fos**  
 HEK 293 cells were transfected with the indicated constructs. After 36 h, the cells were lysed and JunB or c-Fos were immunoprecipitated using anti-HA or anti-Flag antibodies, respectively. Total lysates and immunoprecipitates were analyzed by immunoblotting.

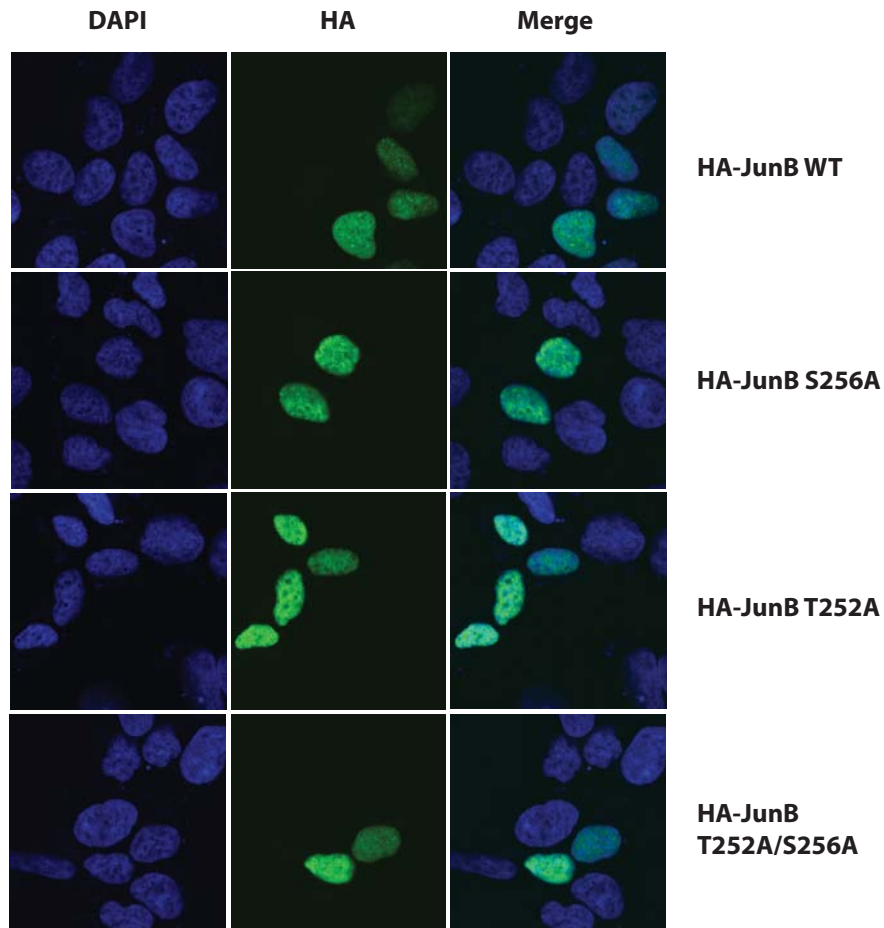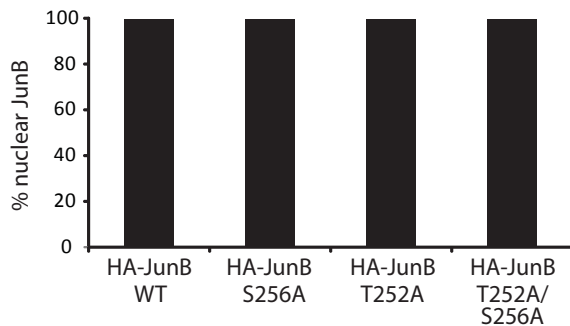

**Figure S9 . Phosphorylation of Ser256 and Thr252 does not regulate the nuclear localization of JunB**

HEK 293 cells were transfected with the indicated HA-tagged JunB constructs and analyzed by immunofluorescence with anti-HA antibody. Nuclei were stained with DAPI. JunB WT and mutants were localized in the nucleus of 100% of cells.

**A**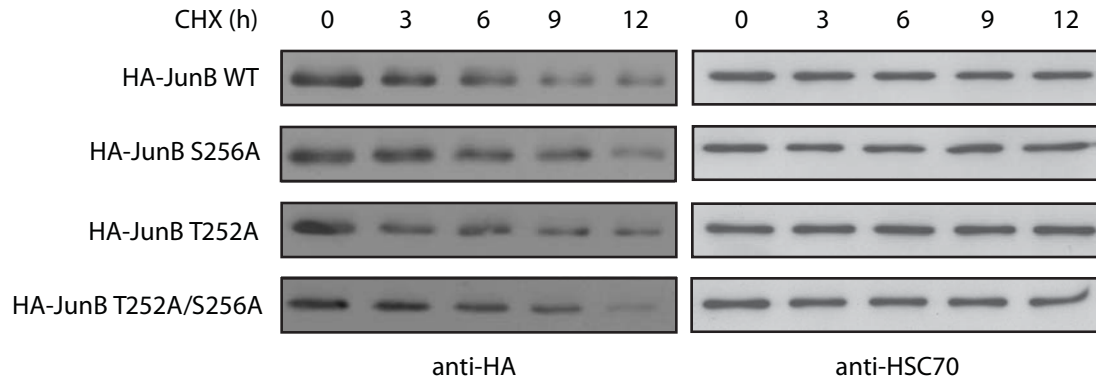**B**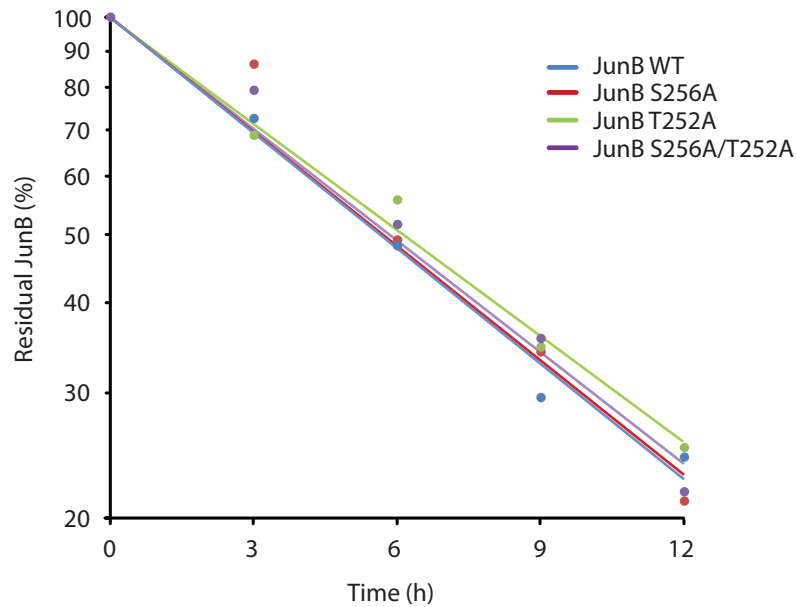

**Figure S10. Phosphorylation of Ser256 and Thr252 does not regulate the stability of JunB in proliferating NIH 3T3 cells**

(A) NIH 3T3 cells were transfected with the indicated HA-tagged JunB constructs and treated with cycloheximide (50  $\mu\text{g}/\text{ml}$ ) for the indicated times. The expression of ectopic JunB was monitored by immunoblotting with anti-HA antibody. (B) Quantification of immunoblotting data shown in A. JunB levels were measured by densitometric analysis of immunoblots.

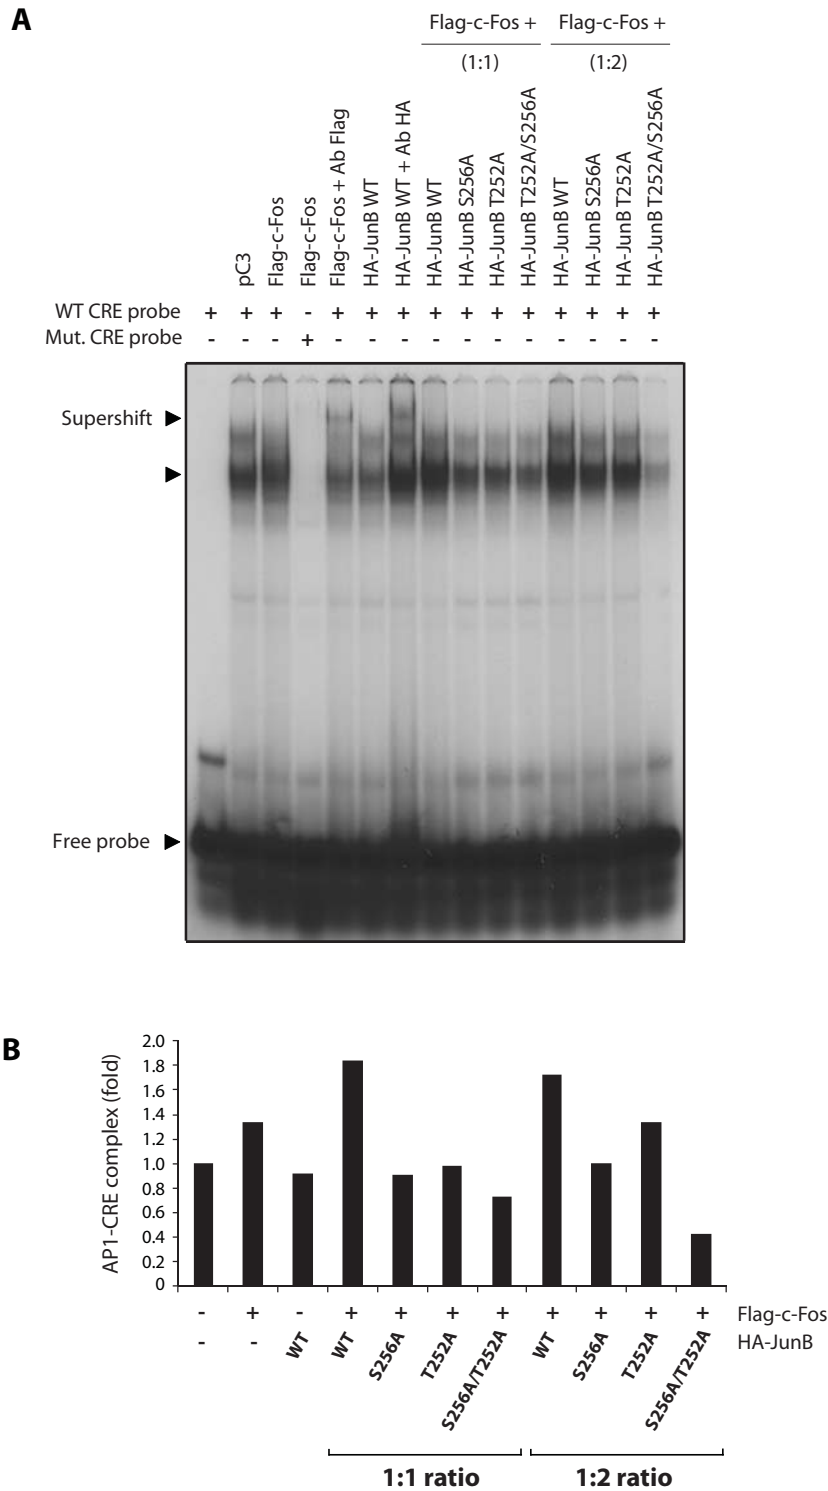

**Figure S11. ERK1/2 phosphorylation of JunB on Ser256 promotes cooperative DNA binding of JunB/c-Fos heterodimers.**

(A) HEK 293 cells were transfected with the indicated constructs and nuclear extracts were analyzed by EMSA using a radiolabeled CRE probe. Supershift analyses were performed by incubating nuclear extracts with Flag or HA antibody. Results are representative of 3 experiments. (B) Quantification of EMSA results in A by densitometric analysis. The results are normalized to control cells transfected with empty pcDNA3.
